# Supplementary material for: Does Community-Level Social Capital Predict Decline in Instrumental Activities of Daily Living? A JAGES Prospective Cohort Study
Source: MDPI journal article supplement (doi:10.3390/ijerph16050828), 2019-03-07
Supplement: s1 [file s1]

**Table 1.** Sensitivity analysis: Association of IADL disability with community- and individual-level variables determined by multilevel logistic regression <sup>a</sup>.

| Variables                                                                     | Model 1 |             | Model 2 |             | Model 3 |             |
|-------------------------------------------------------------------------------|---------|-------------|---------|-------------|---------|-------------|
|                                                                               | OR      | (95% CI)    | OR      | (95% CI)    | OR      | (95% CI)    |
| <i>Community-level independent variable</i>                                   |         |             |         |             |         |             |
| Social cohesion (ref. < -0.540)                                               |         |             |         |             |         |             |
| -0.540-0.115                                                                  | 1.29    | (1.09-1.54) | 1.05    | (0.87-1.26) | 1.04    | (0.86-1.25) |
| 0.116-0.6022                                                                  | 1.48    | (1.24-1.76) | 1.12    | (0.93-1.35) | 1.10    | (0.91-1.33) |
| ≥0.6023                                                                       | 1.55    | (1.30-1.85) | 1.10    | (0.90-1.33) | 1.07    | (0.88-1.31) |
| Civic participation (ref. < -0.526)                                           |         |             |         |             |         |             |
| -0.526-0.012                                                                  | 0.81    | (0.72-0.91) | 0.86    | (0.76-0.97) | 0.86    | (0.76-0.98) |
| 0.0121-0.564                                                                  | 0.77    | (0.68-0.87) | 0.87    | (0.76-0.99) | 0.87    | (0.76-0.99) |
| ≥0.565                                                                        | 0.56    | (0.48-0.64) | 0.73    | (0.61-0.87) | 0.74    | (0.62-0.88) |
| Reciprocity (ref. <-0.418)                                                    |         |             |         |             |         |             |
| -0.418-0.190                                                                  | 1.20    | (1.03-1.41) | 1.13    | (0.96-1.31) | 1.11    | (0.95-1.30) |
| 0.191-0.559                                                                   | 1.18    | (1.01-1.38) | 1.05    | (0.89-1.23) | 1.04    | (0.89-1.22) |
| ≥0.560                                                                        | 1.20    | (1.02-1.42) | 1.12    | (0.95-1.32) | 1.12    | (0.94-1.32) |
| <i>Community-level covariates</i>                                             |         |             |         |             |         |             |
| Average annual household income (1000 yen)                                    |         |             | 1.18    | (1.01-1.37) | 1.21    | (1.05-1.41) |
| Population density (people/km <sup>2</sup> of inhabitable area) (ref ≥10,123) |         |             |         |             |         |             |
| <2040                                                                         |         |             | 1.84    | (1.45-2.35) | 1.78    | (1.40-2.27) |
| 2040-6852                                                                     |         |             | 1.55    | (1.25-1.91) | 1.50    | (1.22-1.85) |
| 6853-10,122                                                                   |         |             | 1.05    | (0.84-1.30) | 1.04    | (0.83-1.29) |
| Area (km <sup>2</sup> ) (ref ≥5.135)                                          |         |             |         |             |         |             |
| <1.256                                                                        |         |             | 1.09    | (0.85-1.39) | 1.07    | (0.83-1.36) |
| 1.256-2.2563                                                                  |         |             | 1.02    | (0.83-1.24) | 1.01    | (0.83-1.23) |
| 2.2564-5.134                                                                  |         |             | 1.09    | (0.96-1.24) | 1.10    | (0.97-1.24) |
| <i>Individual-level independent variable</i> (ref. no)                        |         |             |         |             |         |             |
| Social cohesion                                                               |         |             | 0.87    | (0.76-0.99) | 0.94    | (0.83-1.08) |
| Civic participation                                                           |         |             | 0.63    | (0.58-0.69) | 0.68    | (0.63-0.74) |
| Reciprocity                                                                   |         |             | 1.08    | (0.74-1.58) | 1.19    | (0.81-1.73) |
| <i>Individual-level covariates</i>                                            |         |             |         |             |         |             |
| Sex (ref. women)                                                              |         |             |         |             |         |             |
| Men                                                                           |         |             | 2.45    | (2.24-2.68) | 2.55    | (2.31-2.82) |
| Age (ref. 65-69)                                                              |         |             |         |             |         |             |
| 70-74                                                                         |         |             | 1.24    | (1.12-1.38) | 1.22    | (1.10-1.36) |

|                                                           |       |             |       |             |
|-----------------------------------------------------------|-------|-------------|-------|-------------|
| 75–79                                                     | 1.71  | (1.53–1.91) | 1.64  | (1.46–1.84) |
| 80–84                                                     | 3.00  | (2.62–3.43) | 2.83  | (2.46–3.24) |
| ≥85                                                       | 5.52  | (4.46–6.82) | 5.22  | (4.21–6.47) |
| Marital status (ref. divorced)                            |       |             |       |             |
| Married                                                   | 2.60  | (1.84–3.67) | 2.73  | (1.94–3.86) |
| Widowed                                                   | 2.32  | (1.63–3.30) | 2.36  | (1.65–3.37) |
| Never married                                             | 1.36  | (0.82–2.25) | 1.36  | (0.83–2.26) |
| Educational attainment (ref. 10–12 years)                 |       |             |       |             |
| <10                                                       | 1.41  | (1.29–1.55) | 1.39  | (1.27–1.53) |
| ≥13                                                       | 0.92  | (0.82–1.03) | 0.92  | (0.82–1.04) |
| Annual household income (yen) (ref. ≥4,000,000)           |       |             |       |             |
| <2,000,000                                                | 1.09  | (0.94–1.26) | 1.04  | (0.90–1.20) |
| 2,000,000–3,999,999                                       | 1.01  | (0.87–1.16) | 1.00  | (0.86–1.15) |
| Presence of illnesses (ref. no)                           |       |             |       |             |
| Yes                                                       |       |             | 1.13  | (1.02–1.24) |
| Depression symptoms (ref. no depression) (GDS-5)          |       |             |       |             |
| Depression symptom (GDS >5)                               |       |             | 1.25  | (1.13–1.38) |
| Body mass index (ref. 18.5–24.9)                          |       |             |       |             |
| <18.5                                                     |       |             | 1.12  | (0.94–1.33) |
| ≥25.0                                                     |       |             | 1.15  | (1.04–1.26) |
| Smoking habit (ref. no)                                   |       |             |       |             |
| Yes                                                       |       |             | 1.19  | (1.06–1.35) |
| Alcohol consumption (ref. no)                             |       |             |       |             |
| Yes                                                       |       |             | 0.91  | (0.83–1.00) |
| Daily walking time (ref. ≥30 min/day)                     |       |             |       |             |
| <30                                                       |       |             | 1.33  | (1.22–1.45) |
| Frequency of going outside (ref. 1 time or more per week) |       |             |       |             |
| Less than 1 time per week                                 |       |             | 1.61  | (1.36–1.92) |
| Random-effects parameters                                 |       |             |       |             |
| Community-level variance (standard error)                 | 0.117 | 0.039       | 0.058 | 0.067       |
|                                                           |       |             | 0.043 | 0.091       |

OR: Odds ratios; CI: Confidence interval; ref.: reference. <sup>a</sup>Random-effects of estimate (standard error) of Null model was 0.26 (0.035). Model 1: Each community-level social capital variable was incorporated into the model without adjustment. Model 2: Model 1 + community-level average annual household income, population density, area, individual-level social capital, sex, age, marital status, educational attainment, and annual household income. Model 3: Model 2 + presence of illnesses, depression symptoms, body mass index, smoking habit, alcohol consumption, daily walking time, and frequency of going outside.



|                                                           |       |             |                       |             |                        |             |       |             |
|-----------------------------------------------------------|-------|-------------|-----------------------|-------------|------------------------|-------------|-------|-------------|
| <10                                                       | 1.33  | (1.18–1.50) | 1.59                  | (1.36–1.85) | 1.51                   | (1.34–1.70) | 1.37  | (1.18–1.60) |
| ≥13                                                       | 0.94  | (0.82–1.08) | 0.78                  | (0.59–1.02) | 0.92                   | (0.79–1.07) | 0.97  | (0.79–1.18) |
| Annual household income (yen) (ref. ≥4,000,000)           |       |             |                       |             |                        |             |       |             |
| <2,000,000                                                | 1.10  | (0.92–1.31) | 0.98                  | (0.76–1.26) | 1.24                   | (1.03–1.50) | 0.80  | (0.64–1.01) |
| 2,000,000–3,999,999                                       | 1.06  | (0.89–1.26) | 0.95                  | (0.73–1.22) | 1.13                   | (0.94–1.36) | 0.84  | (0.67–1.05) |
| Presence of illnesses (ref. no)                           |       |             |                       |             |                        |             |       |             |
| Yes                                                       | 1.10  | (0.98–1.24) | 1.16                  | (0.97–1.40) | 1.14                   | (1.01–1.29) | 1.13  | (0.95–1.35) |
| Depression symptoms (ref. no depression) (GDS-5)          |       |             |                       |             |                        |             |       |             |
| Depression symptom (GDS >5)                               | 1.19  | (1.04–1.35) | 1.47                  | (1.25–1.73) | 1.19                   | (1.04–1.36) | 1.35  | (1.15–1.57) |
| Body mass index (ref. 18.5–24.9)                          |       |             |                       |             |                        |             |       |             |
| <18.5                                                     | 1.09  | (0.85–1.39) | 1.30                  | (1.01–1.68) | 1.20                   | (0.94–1.54) | 1.20  | (0.94–1.53) |
| ≥25.0                                                     | 0.96  | (0.85–1.08) | 1.55                  | (1.32–1.82) | 1.12                   | (0.99–1.26) | 1.12  | (0.95–1.31) |
| Smoking habit (ref. no)                                   |       |             |                       |             |                        |             |       |             |
| Yes                                                       | 1.18  | (1.04–1.34) | 0.94                  | (0.59–1.50) | 1.16                   | (1.00–1.33) | 1.02  | (0.81–1.30) |
| Alcohol consumption (ref. no)                             |       |             |                       |             |                        |             |       |             |
| Yes                                                       | 0.90  | (0.81–1.00) | 0.87                  | (0.71–1.08) | 0.86                   | (0.77–0.97) | 0.92  | (0.79–1.07) |
| Daily walking time (ref. ≥30 min/day)                     |       |             |                       |             |                        |             |       |             |
| <30                                                       | 1.30  | (1.17–1.45) | 1.42                  | (1.23–1.63) | 1.34                   | (1.19–1.50) | 1.39  | (1.22–1.58) |
| Frequency of going outside (ref. 1 time or more per week) |       |             |                       |             |                        |             |       |             |
| Less than 1 time per week                                 | 1.52  | (1.20–1.92) | 1.63                  | (1.25–2.11) | 1.51                   | (1.17–1.94) | 1.68  | (1.33–2.13) |
| Random-effects parameters                                 |       |             |                       |             |                        |             |       |             |
| Community-level variance (standard error)                 | 0.023 | 0.225       | $3.85 \times 10^{-7}$ | 0.191       | $3.16 \times 10^{-10}$ | 0.104       | 0.062 | 0.129       |

OR: Odds ratios; CI: Confidence interval; ref.: reference. <sup>a</sup> Adjusted for each community-level social capital variable, community-level average annual household income, population density, area, individual-level social capital, age, marital status, educational attainment, annual household income, presence of illnesses, depression symptoms, body mass index, smoking habit, alcohol consumption, daily walking time, and frequency of going outside. <sup>b</sup> Adjusted for each community-level social capital variable, community-level average annual household income, population density, area, individual-level social capital, sex, marital status, educational attainment, annual household income, presence of illnesses, depression symptoms, body mass index, smoking habit, alcohol consumption, daily walking time, and frequency of going outside.
